# Supplementary material for: A series of new lanthanide fumarates displaying three types of 3-D frameworks
Source: Royal Society of Chemistry journal article supplement (doi:10.1039/c6dt00205f), 2016-01-01
Supplement: c6dt00205f1.pdf [file c6dt00205f1.pdf]

## A series of new lanthanide fumarates displaying three types of 3-D frameworks

Xiao-Feng Tan, Jian Zhou, Lianshe Fu, Hong-Ping Xiao, Hua-Hong Zou, and Qiuling Tang

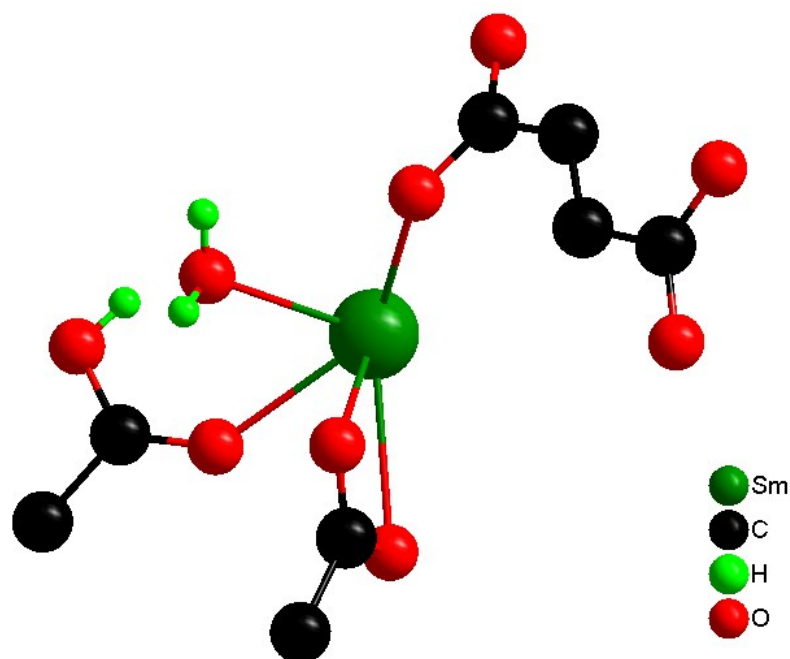

Fig. S1 The asymmetric unit of **1** (H atoms bonded to C atoms have been omitted for clarity).

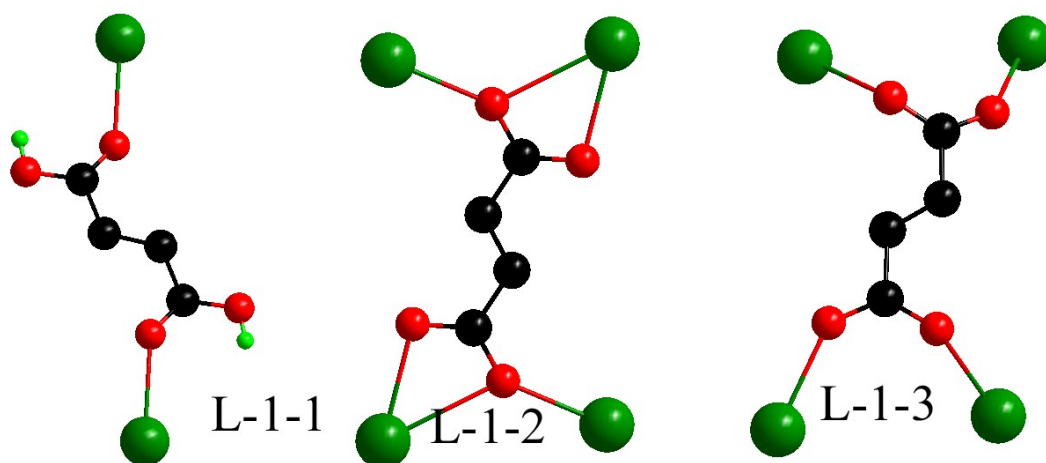

Scheme S1 Three distinct ligand conformations observed in **1**.

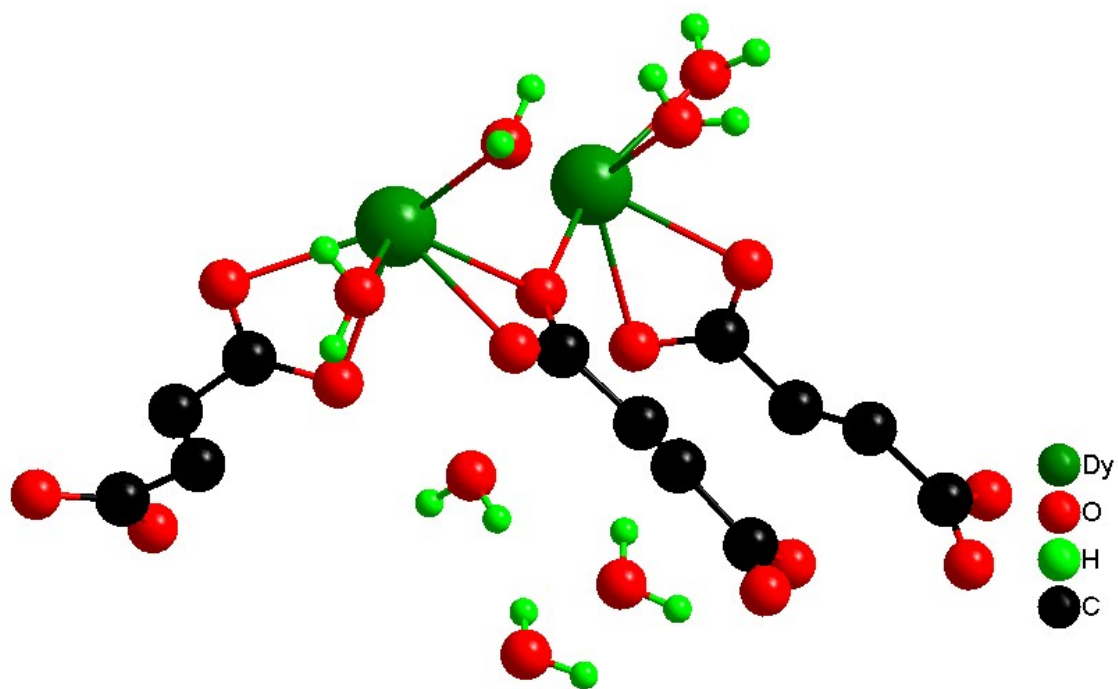

Fig. S2 The asymmetric unit of **2b** (H atoms bonded to C atoms have been omitted for clarity).

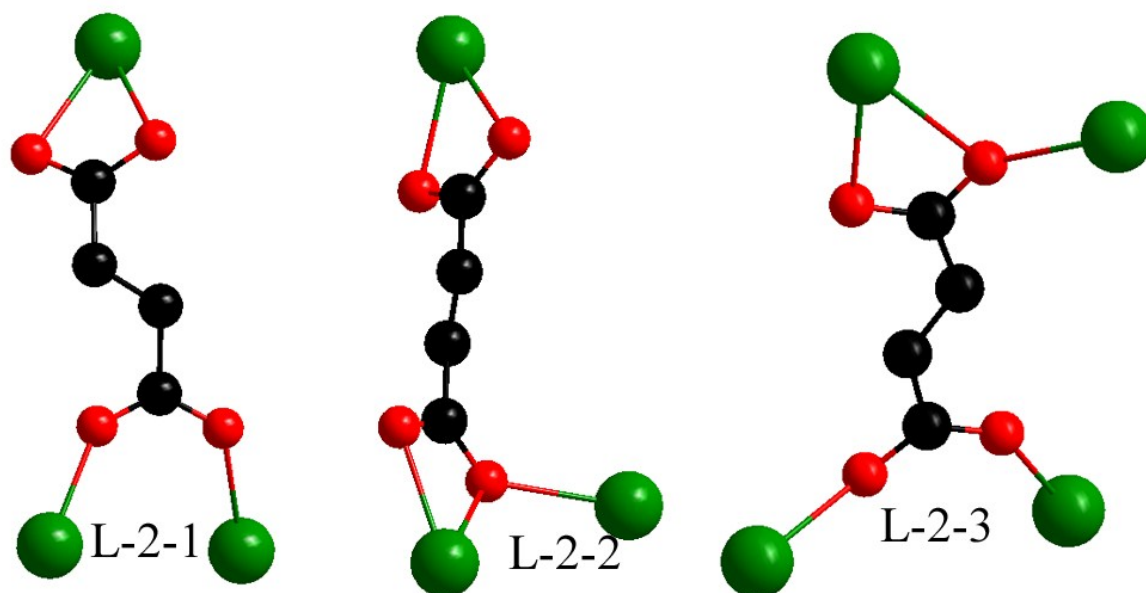

Scheme S2 Three distinct ligand conformations observed in **2b**.

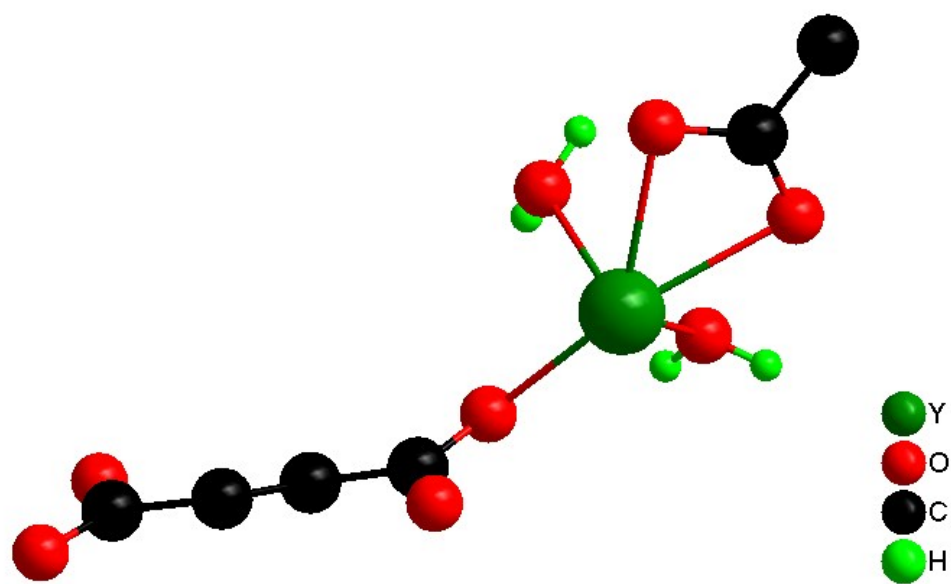

Fig. S3 The asymmetric unit of **3a** (H atoms bonded to C atoms have been omitted for clarity).

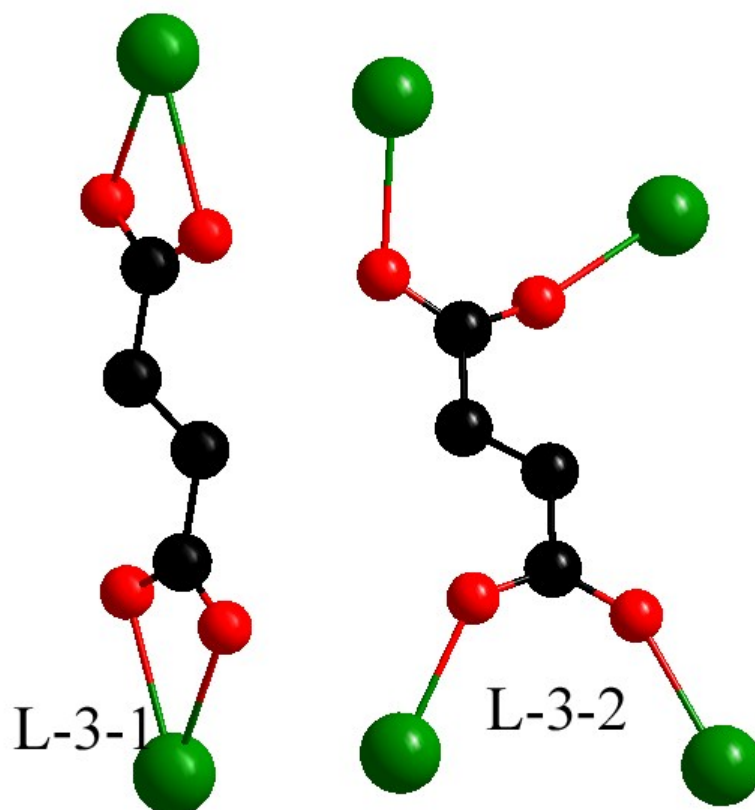

Scheme S3 Two distinct ligand conformations observed in **3a**.

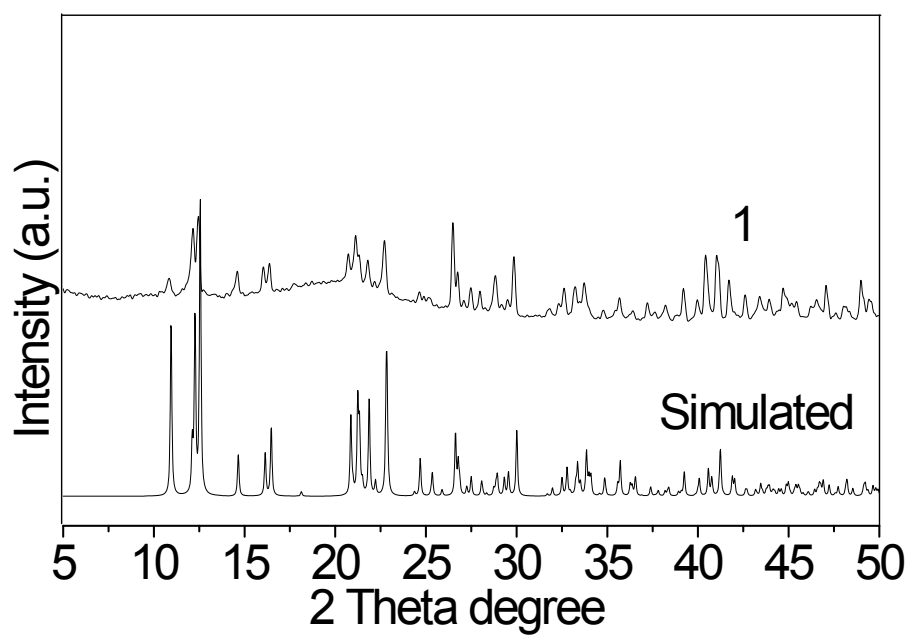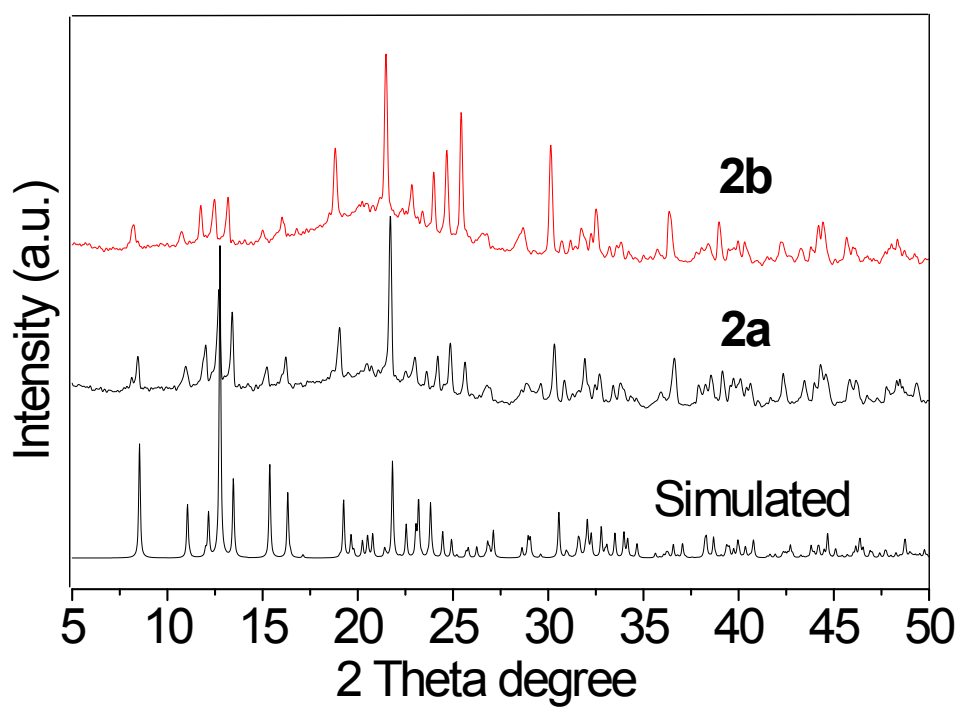

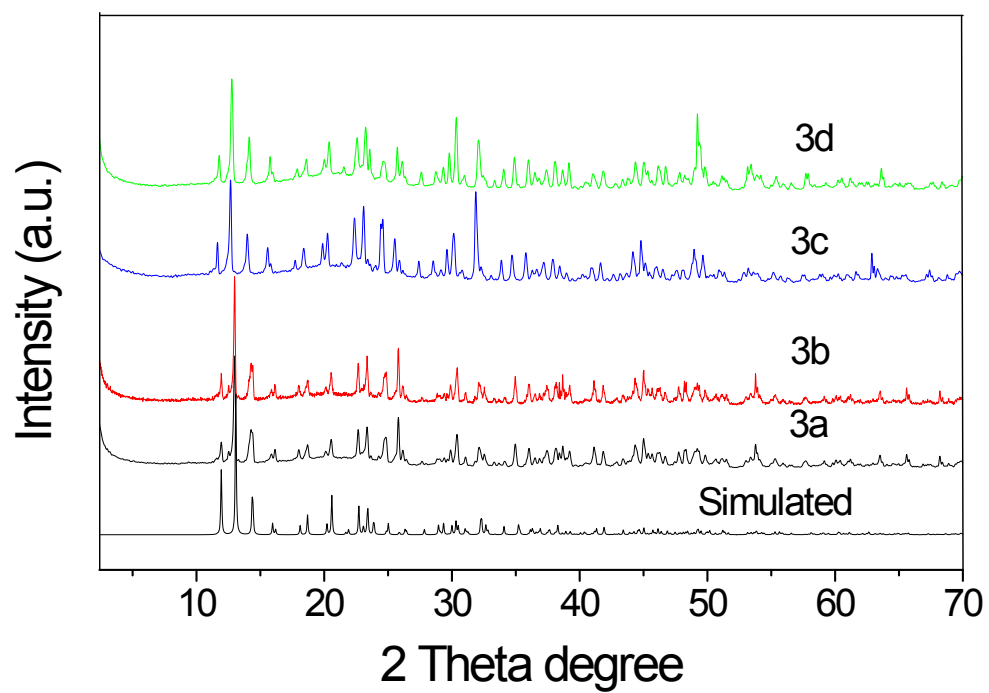

Fig. S4 Simulated and experimental powder XRD patterns of all compounds.

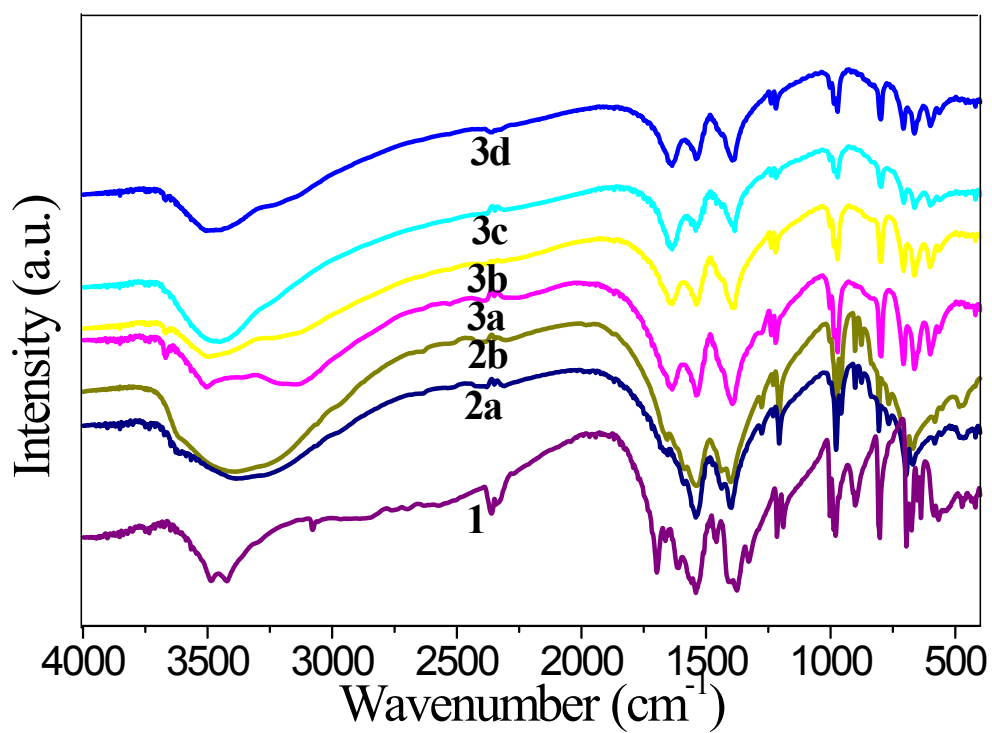

Fig. S5 IR spectra of all compounds.

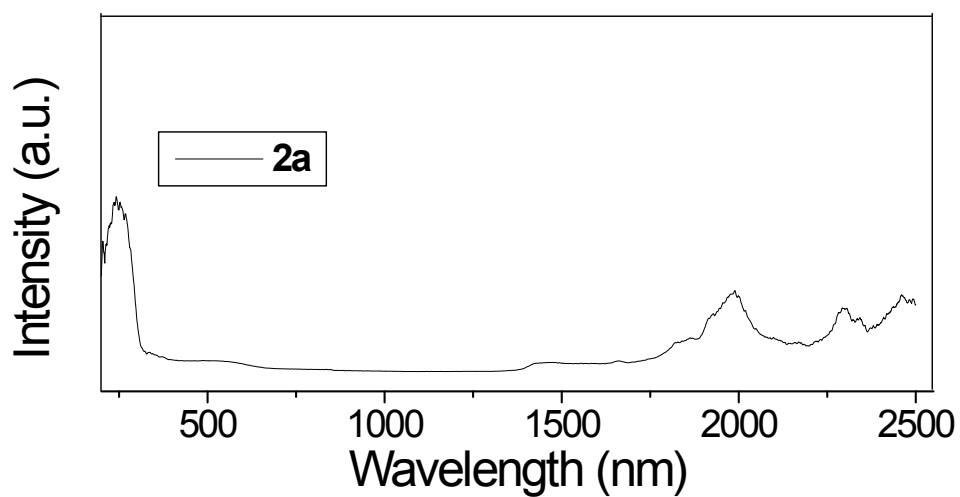

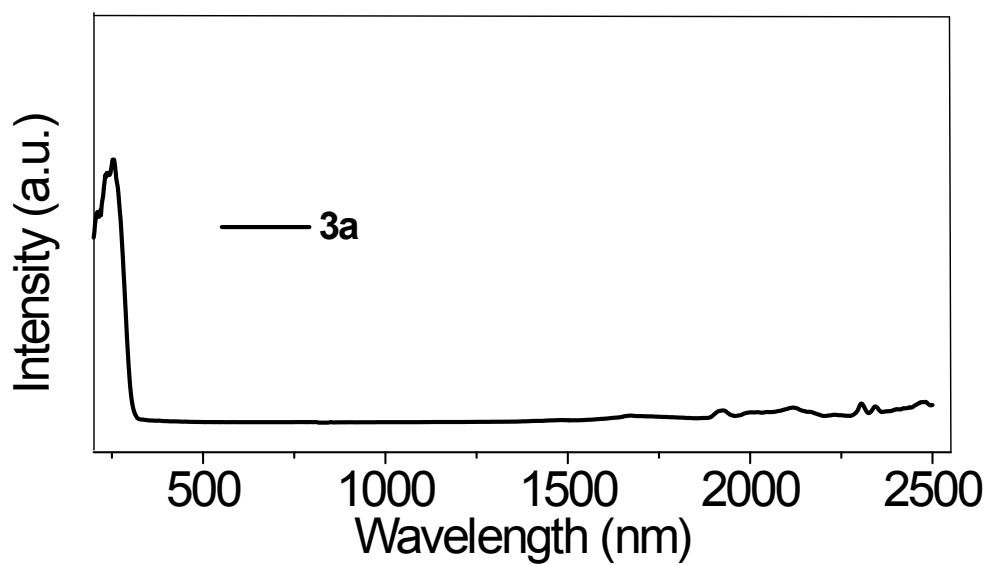

Fig. S6 UV/Vis absorption spectra of compounds **2a** and **3a** at room temperature.

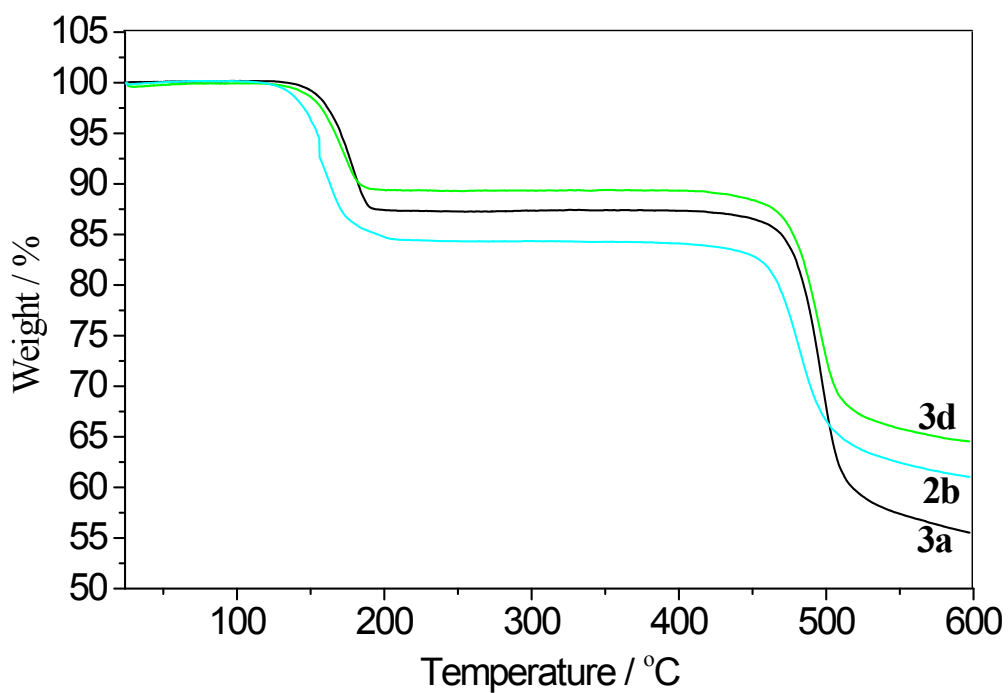

Fig. S7 Thermogravimetric analyses curves of compounds **2b**, **3a** and **3d**.
